# Supplementary material
Source: PubMed Central journal article supplement (PMC5453844)
Supplement: NIHMS848987-supplement-FINAL_PRODUCTION_FILE__SDC_1.pdf [file NIHMS848987-supplement-FINAL_PRODUCTION_FILE__SDC_1.pdf]

## Supplemental Digital Content 1

**Table S1. Bivariate associations among MetS components and SES variables (N = 354).**

|                              | 1 | 2   | 3                | 4                | 5     | 6     | 7     | 8     | 9                | 10                | 11    |
|------------------------------|---|-----|------------------|------------------|-------|-------|-------|-------|------------------|-------------------|-------|
| 1. Early-life SES            | 1 | .07 | .13*             | .14**            | .14** | .15** | .04   | .07   | .09 <sup>Δ</sup> | -.05              | .06   |
| 2. Current SES               |   | 1   | .09 <sup>Δ</sup> | .09 <sup>Δ</sup> | .05   | .07   | -.07  | -.03  | .03              | -.09 <sup>Δ</sup> | .01   |
| 3. MetS diagnosis            |   |     | 1                | .67**            | .58** | .47** | .31** | .34** | .49**            | -.21**            | .43** |
| 4. Number of MetS components |   |     |                  | 1                | .78** | .69** | .45** | .48** | .53**            | -.43**            | .41** |
| 5. MetS factor score         |   |     |                  |                  | 1     | .86** | .62** | .69** | .73**            | -.48**            | .47** |
| 6. Waist circumference       |   |     |                  |                  |       | 1     | .35** | .49** | .48**            | -.39**            | .23** |
| 7. Diastolic blood pressure  |   |     |                  |                  |       |       | 1     | .78** | .35**            | -.11*             | .32** |
| 8. Systolic blood pressure   |   |     |                  |                  |       |       |       | 1     | .33**            | -.19**            | .29** |
| 9. Triglycerides             |   |     |                  |                  |       |       |       |       | 1                | -.24**            | .34** |
| 10. HDL cholesterol          |   |     |                  |                  |       |       |       |       |                  | 1                 | -.08  |
| 11. HbA1c                    |   |     |                  |                  |       |       |       |       |                  |                   | 1     |

\*  $p < .05$ ; \*\*  $p < .01$ ; <sup>Δ</sup>  $p < .10$ .

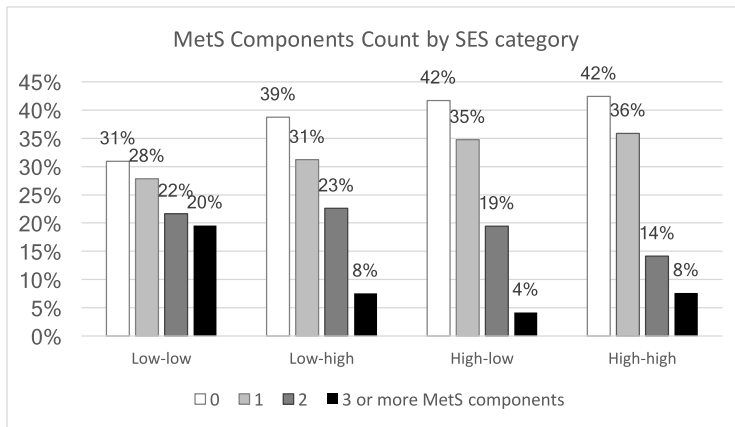

**Figure S1.** Bars depict the percentage of participants within each group exhibiting each count of MetS components (0, 1, 2, 3 or more MetS components).
